# Supplementary material for: Effects of novel HDAC inhibitors on urothelial carcinoma cells
Source: PubMed Central journal article supplement (PMC6069857; doi:10.1186/s13148-018-0531-y), 2018-07-31

VM-CUB-1

HDAC1 mRNA expression

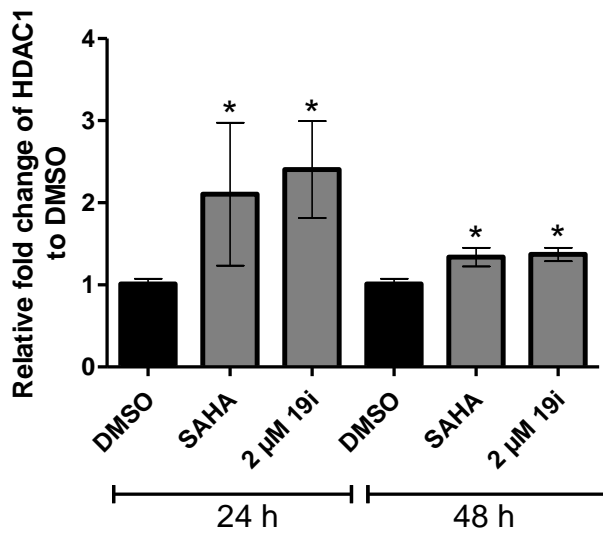

UM-UC-3

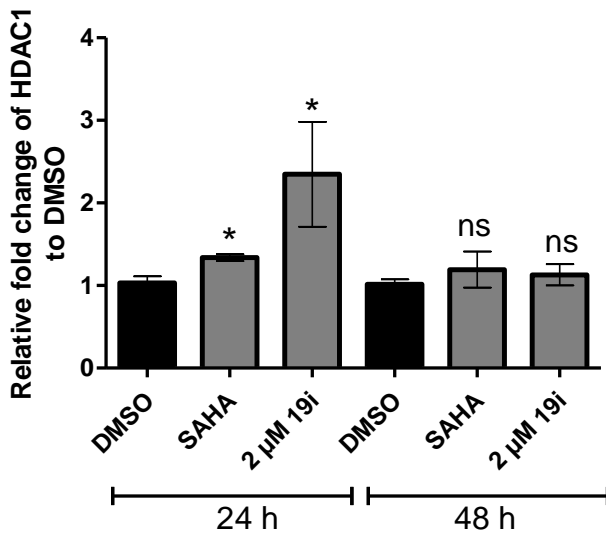

639-V

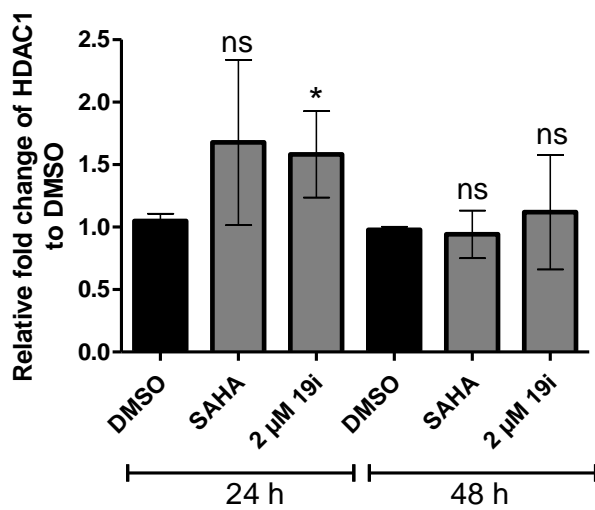

VM-CUB-1

HDAC2 mRNA expression

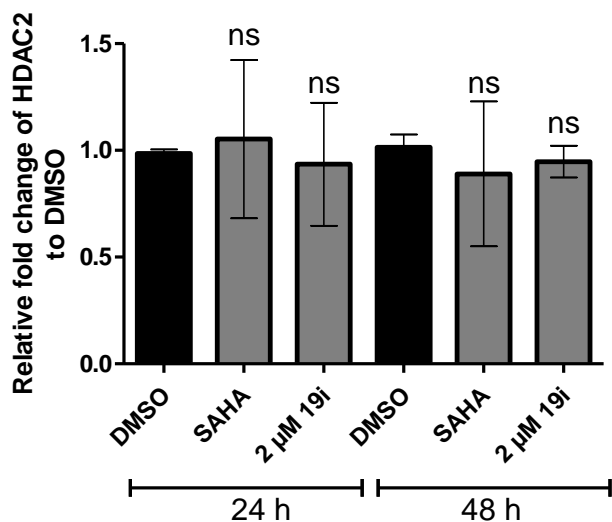

UM-UC-3

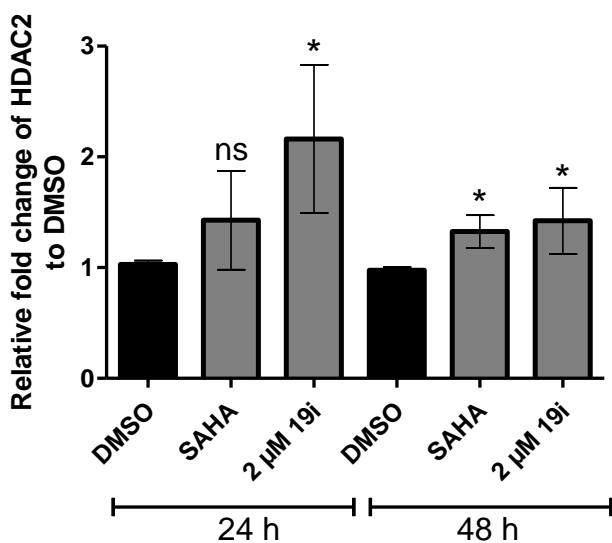

639-V

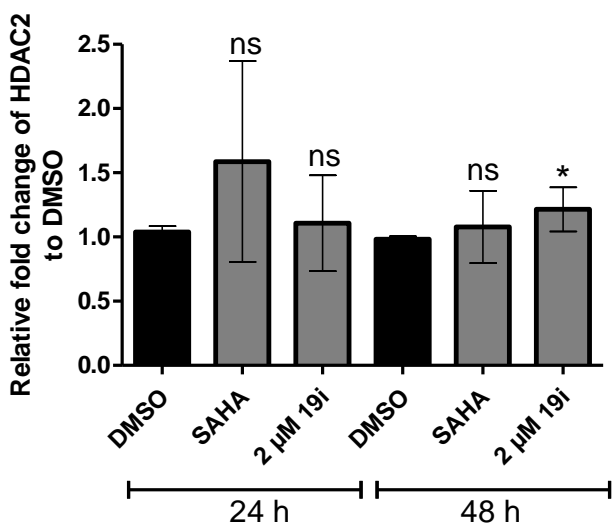

VM-CUB-1

HDAC6 mRNA expression

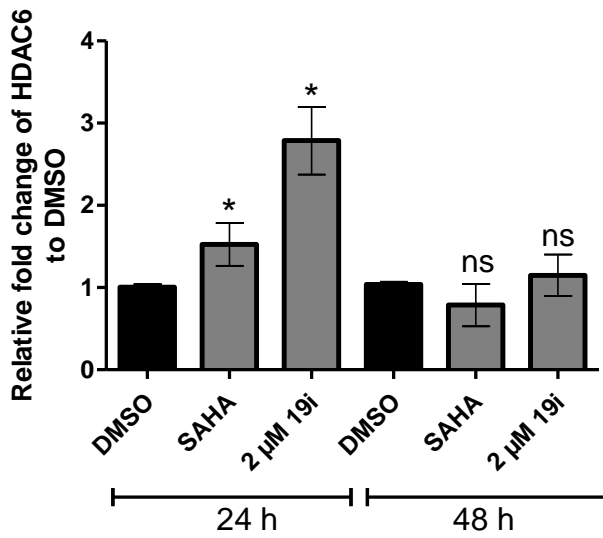

UM-UC-3

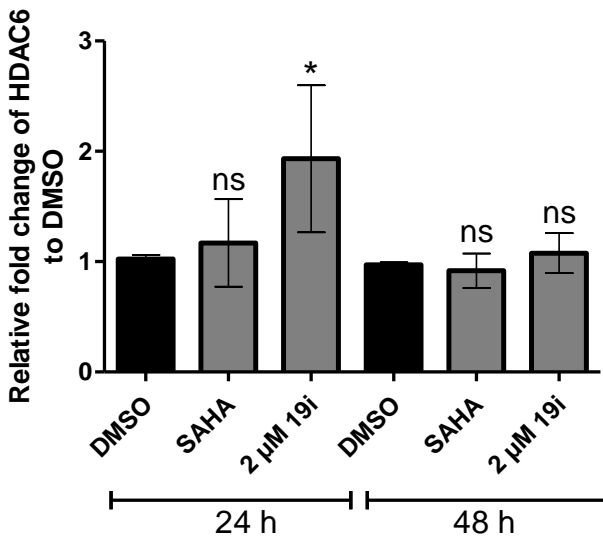

639-V

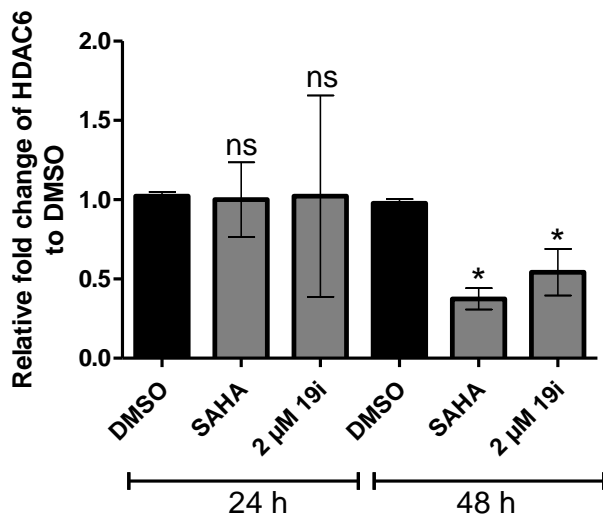

Supplement: 13148_2018_531_MOESM7_ESM.pdf [file 13148_2018_531_MOESM7_ESM.pdf]
